# Supplementary material
Source: bioRxiv or medRxiv preprint supplement (https://medrxiv.org/highwire/filestream/81100/field_highwire_adjunct_files/1/2020.05.13.20101022-2.pdf)
Supplement: Supplementary file [file 2020.05.13.20101022-2.pdf]

## Appendix 2. Plots of simulated and reported $N_D(t)$ and $nCFR(t)$ curves for Australia, Austria, Iceland, Israel, New Zealand, and South Korea.

Similar plots are presented as for Figures 5A and 5B for Germany showing the  $nCFR(t)$  versus day curves for different values of the corrected CFR. In all cases a lognormal  $f_D$  was used with a median value of 14 days and a logSD of 0.50. The simulated curves calculated using the closed case  $nCFR$  on May 7, 2020 as the corrected CFR value are designated by an asterisk.

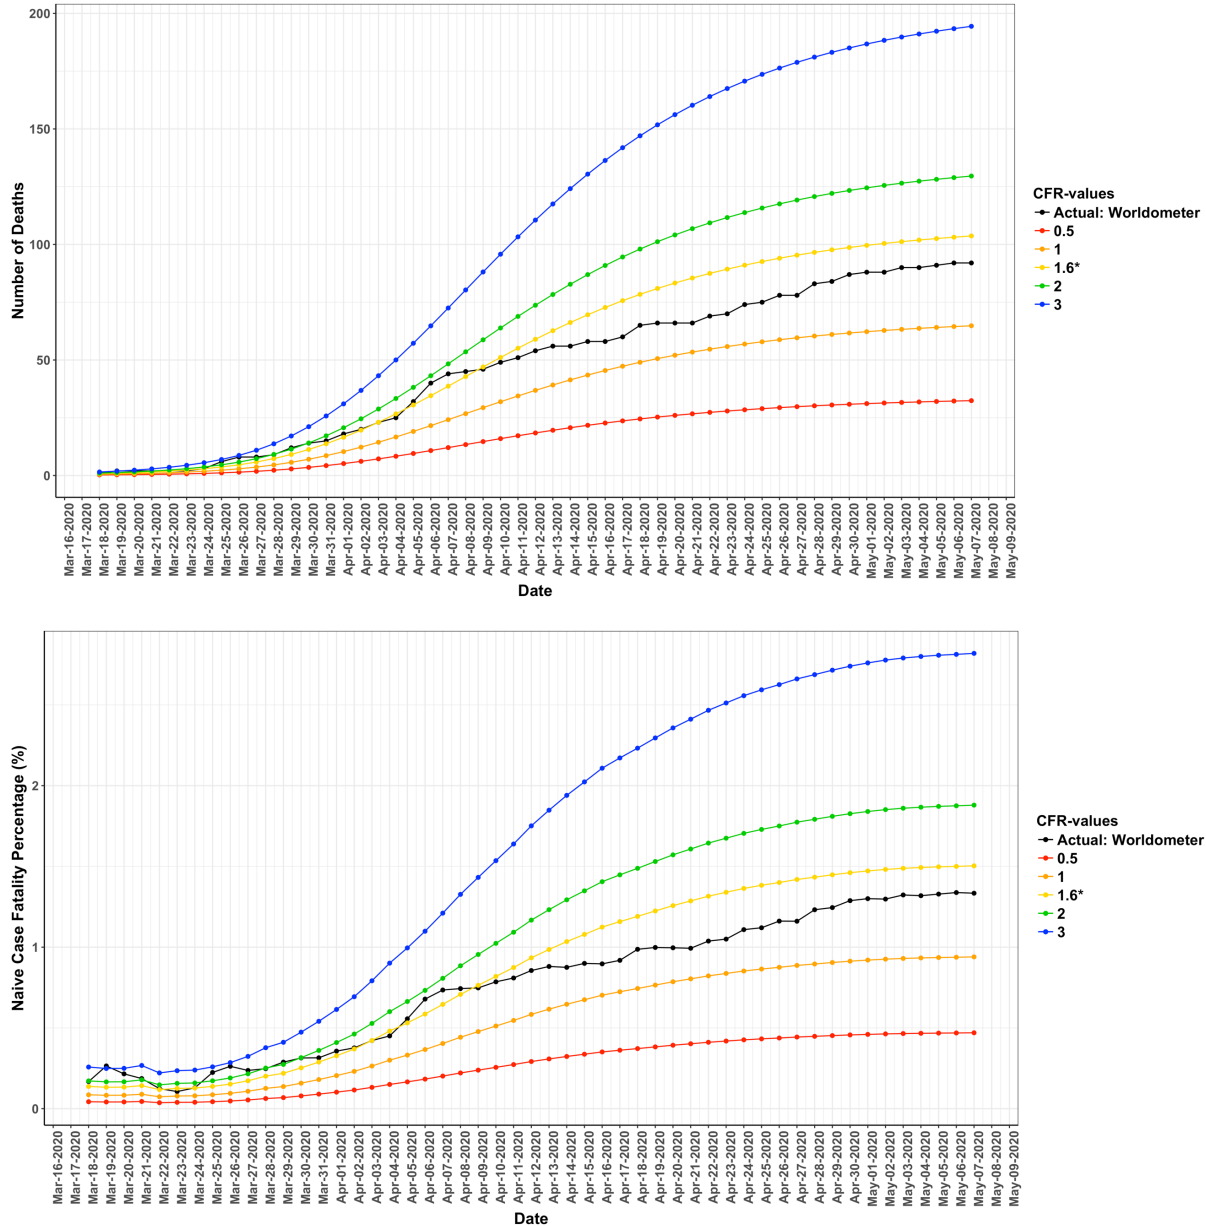

**Figure 1.** Simulated  $nCFR(t)$  and  $N_D(t)$  curves for Australia. The simulated curves shown were calculated using a corrected CFR of 0.50, 1.0, 1.7 (the closed case  $nCFR$ ), 2.0, and 3.0. The reported data is shown in black.

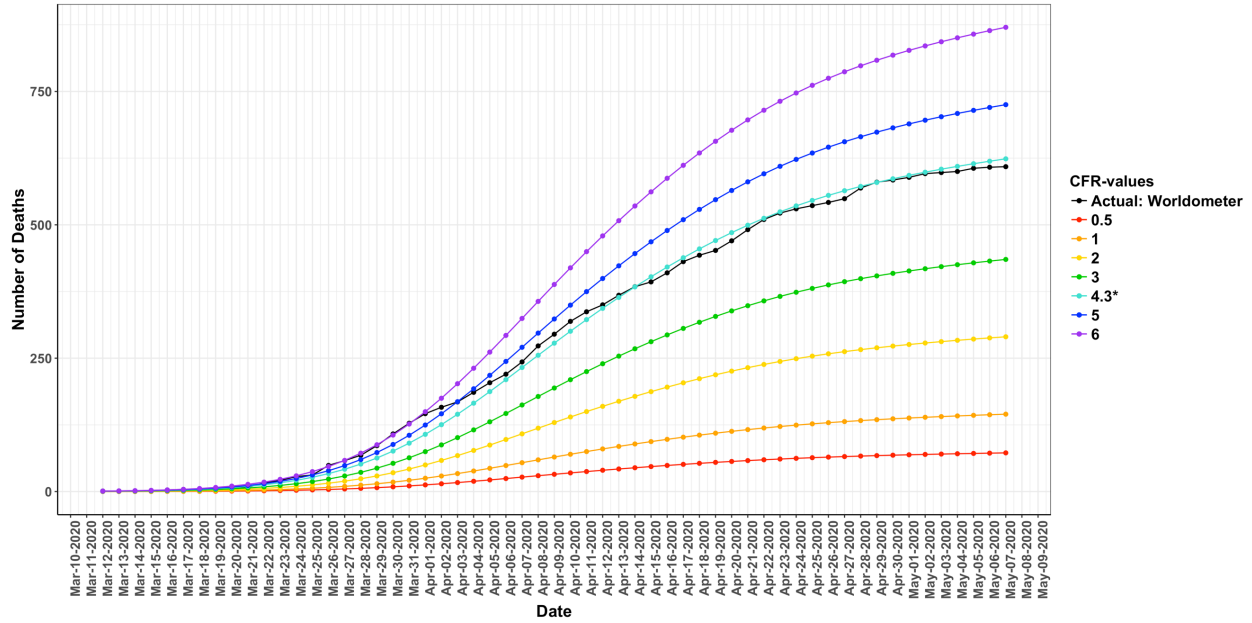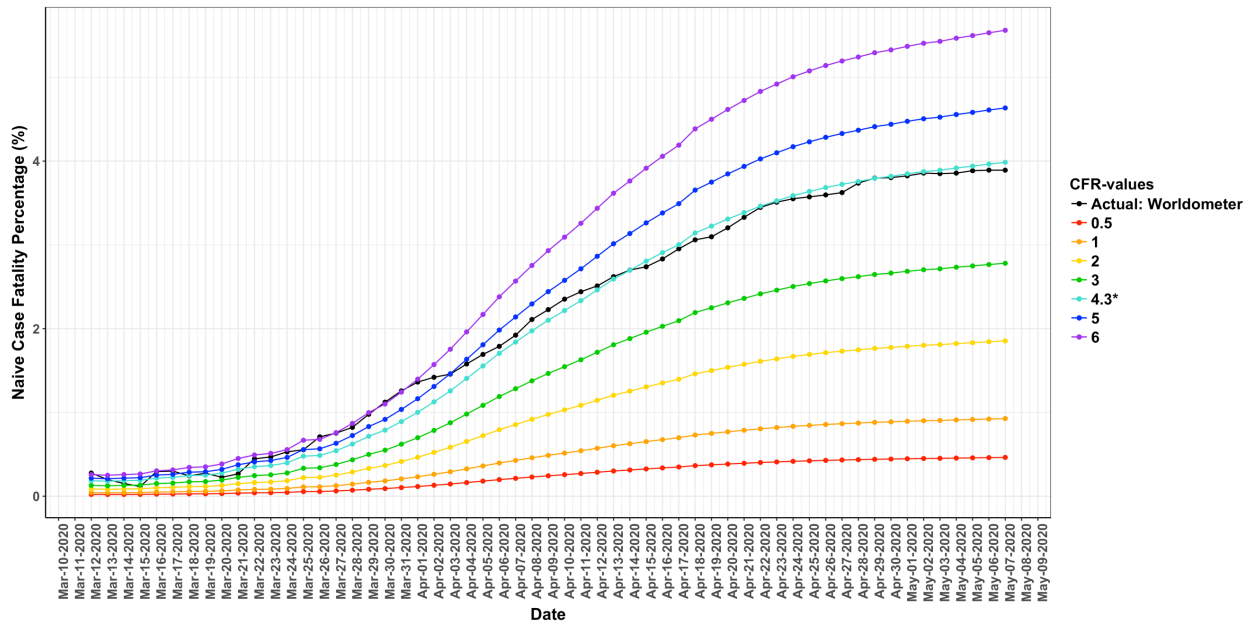

**Figure 2.** Simulated  $nCFR(t)$  and  $N_D(t)$  curves for Austria. The simulated curves shown were calculated using a corrected CFR of 0.50, 1.0, 2.0, 3.0, 4.3 (the closed case  $nCFR$ ), 5.0, and 6.0. The reported data is shown in black.

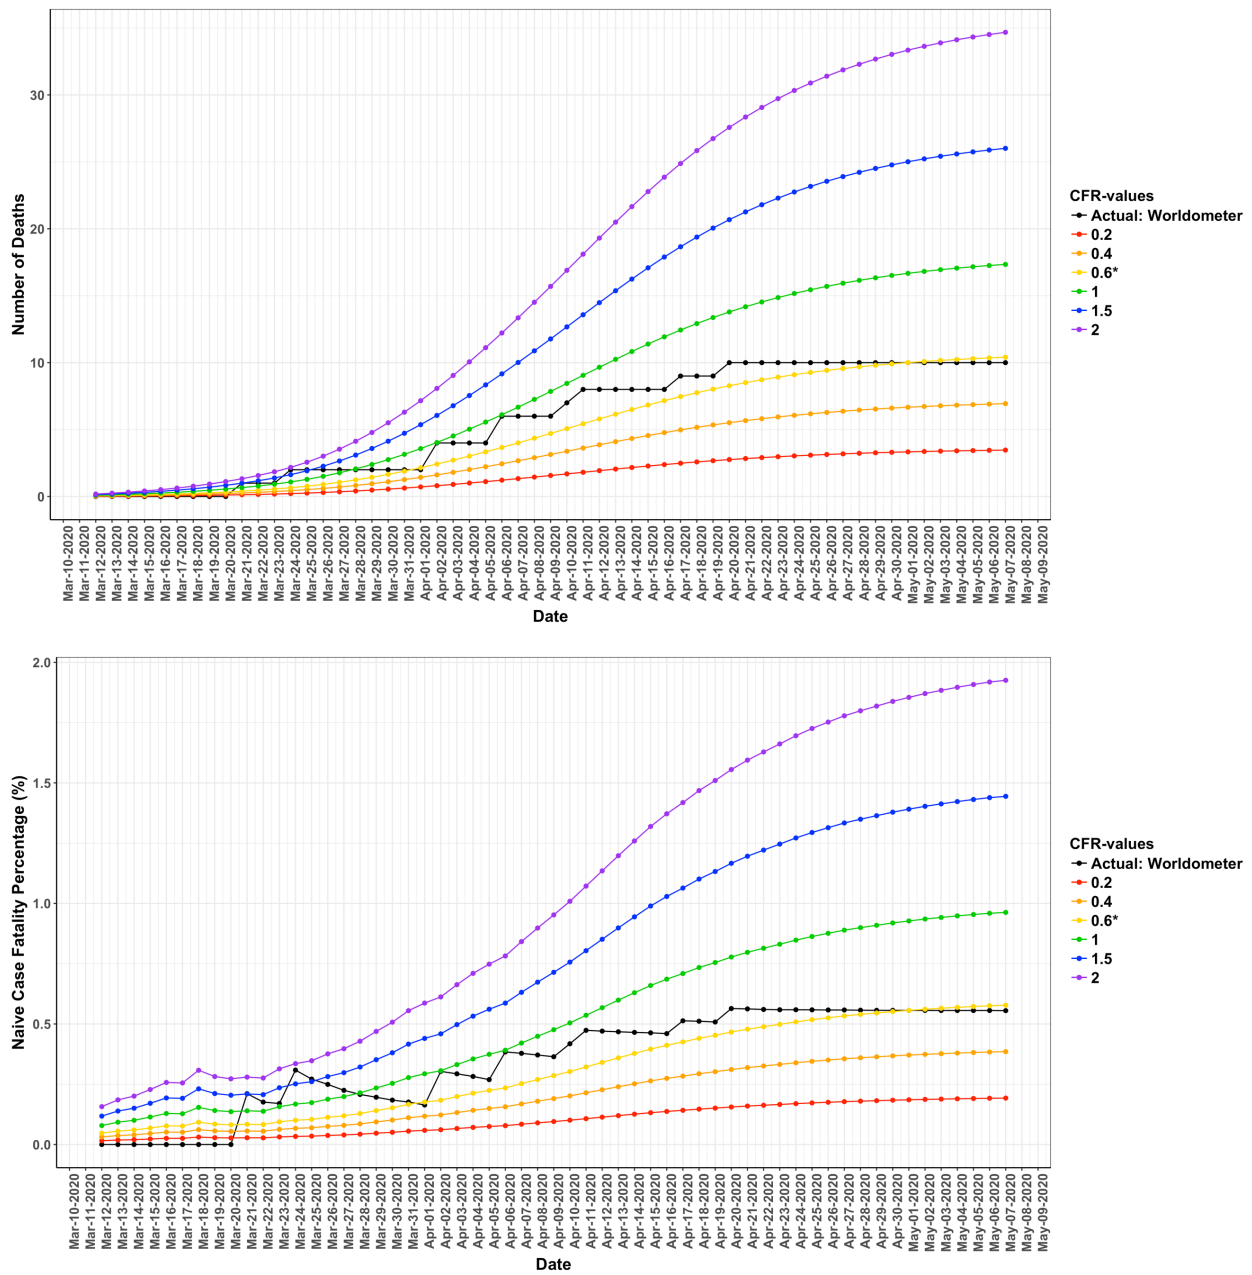

**Figure 3.** Simulated  $nCFR(t)$  and  $N_D(t)$  curves for Iceland. The simulated curves shown were calculated using a corrected CFR of 0.20, 0.50, 0.70 (the closed case  $nCFR$ ), 1.0, 1.5, and 2.0. The reported data is shown in black.

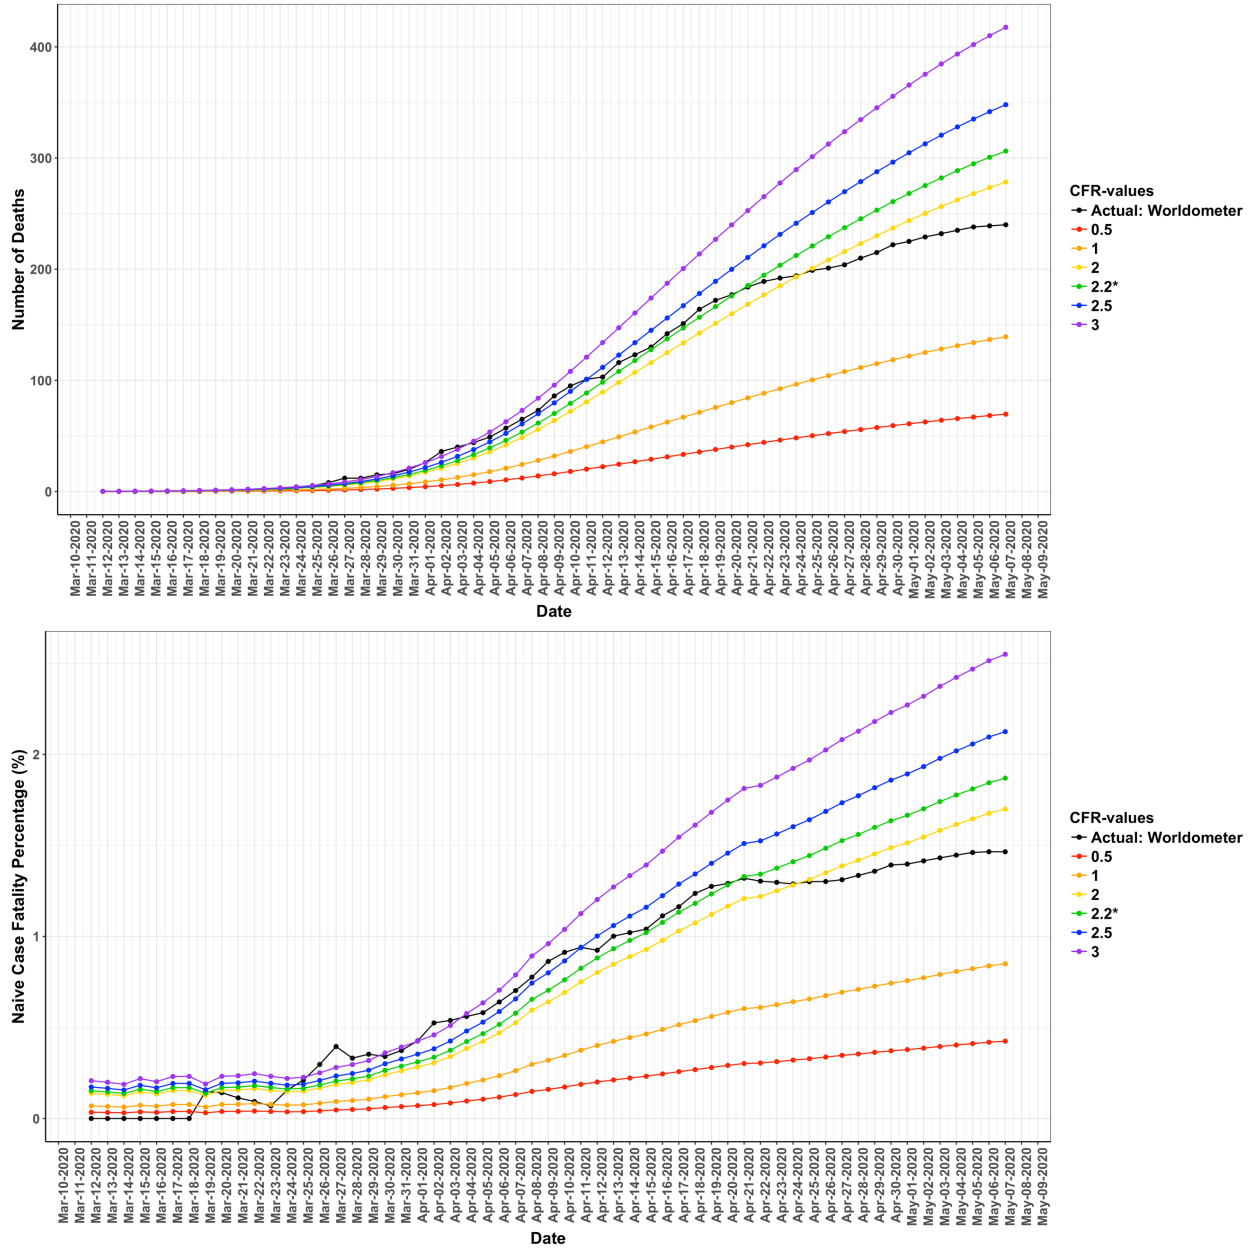

**Figure 4.** Simulated  $nCFR(t)$  and  $N_D(t)$  curves for Israel. The simulated curves shown were calculated using a corrected CFR of 0.50, 1.0, 2.0, 2.2 (the closed case  $nCFR$ ), 2.5, and 3.0. The reported data is shown in black.

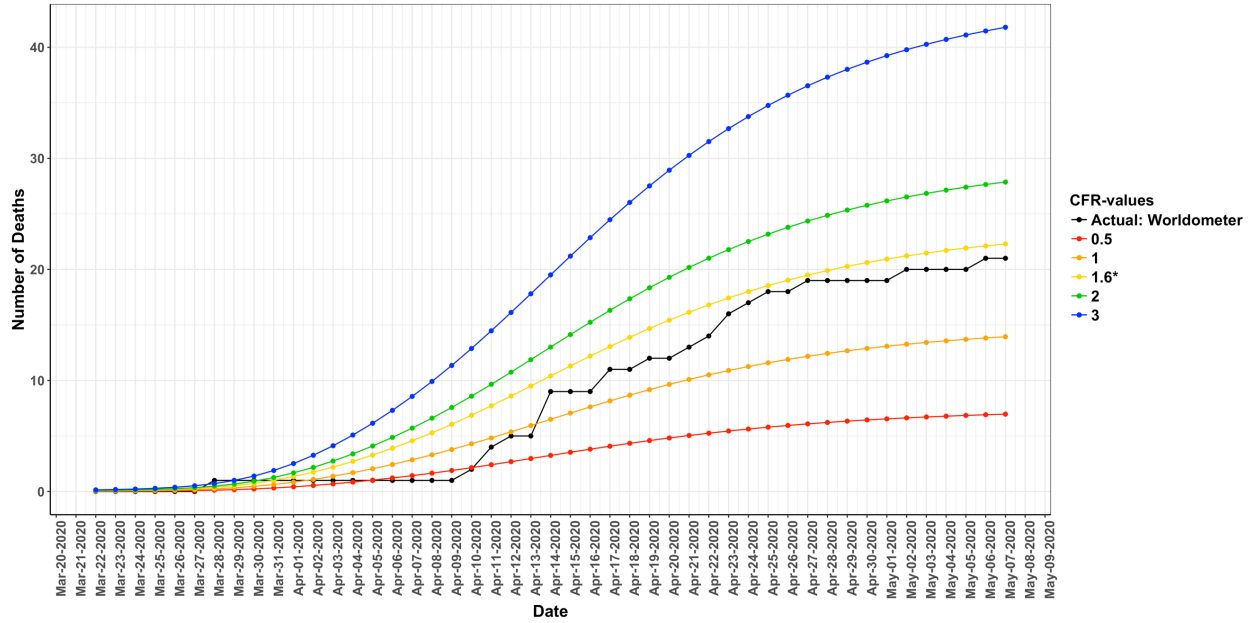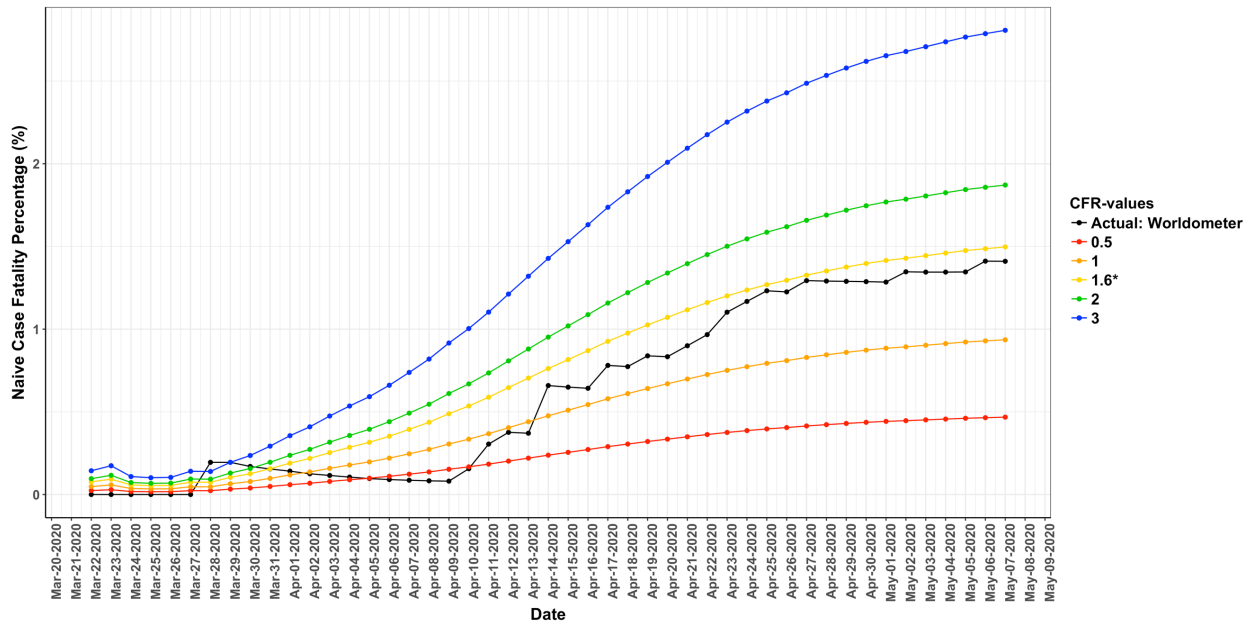

**Figure 5.** Simulated  $nCFR(t)$  and  $N_D(t)$  curves for New Zealand. The simulated curves shown were calculated using a corrected CFR of 0.50, 1.0, 1.6 (the closed case  $nCFR$ ), 2.0, and 3.0. The reported data is shown in black.

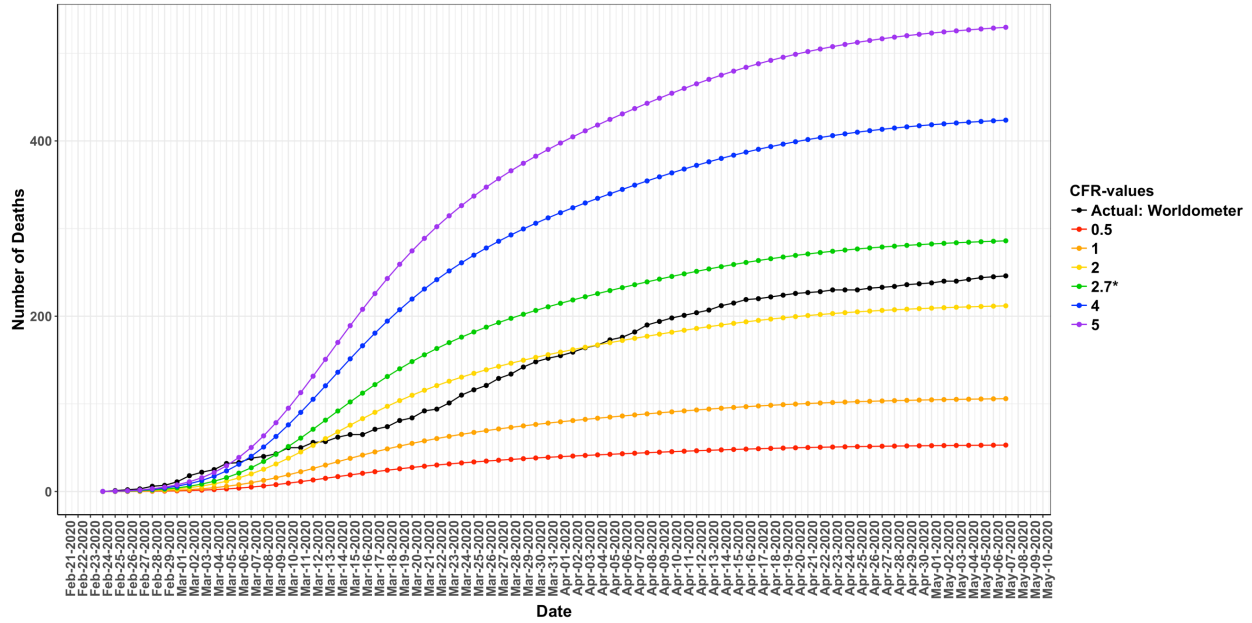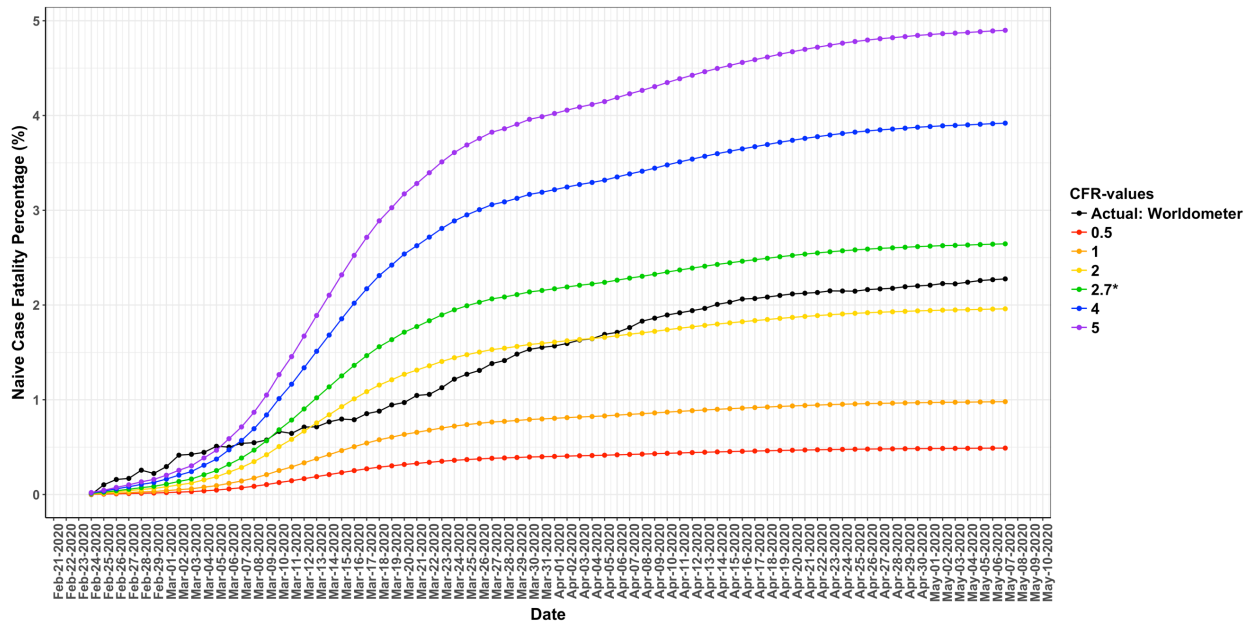

**Figure 6.** Simulated  $nCFR(t)$  and  $N_D(t)$  curves for South Korea. The simulated curves shown were calculated using a corrected CFR of 0.50, 1.0, 2.0, 2.5 (the closed case  $nCFR$ ), 4.0, and 5.0. The reported data is shown in black.
